# Supplementary material for: Plasticity-related gene 5: A novel surface autoantigen in paraneoplastic cerebellar degeneration
Source: PubMed Central journal article supplement — Neurol Neuroimmunol Neuroinflamm. 2015 Sep 24;2(5):e156. doi: 10.1212/NXI.0000000000000156 (PMC4582903; doi:10.1212/nxi.0000000000000156), 2015-09-24
Supplement: supp_2.5.e156_vanCoevorden-Hameete_et_al._Figure_e-1-3_revised.pdf [file supp_2.5.e156_vanCoevorden-Hameete_et_al._Figure_e-1-3_revised.pdf]

Figure e-1. Western blot analysis of PRG5 and PRG1 antibodies.

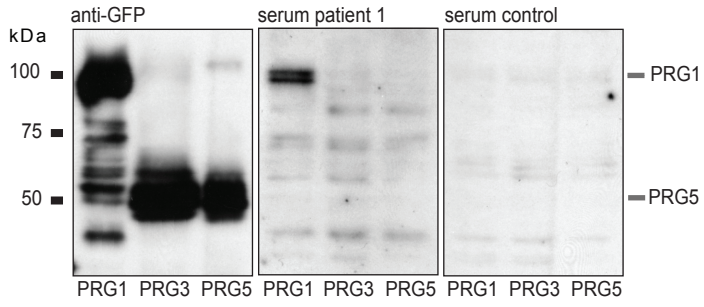

Figure e-2. Purified IgGs integrity test.

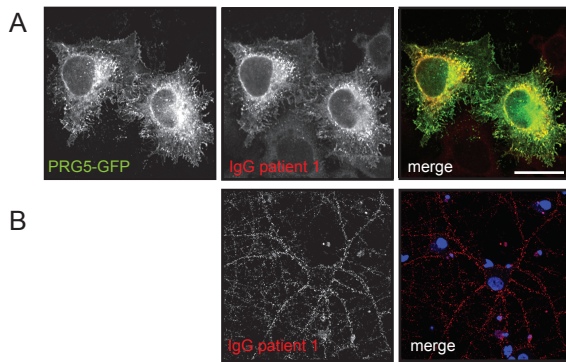

Figure e-3. Mass spectrometry gel and analysis list.

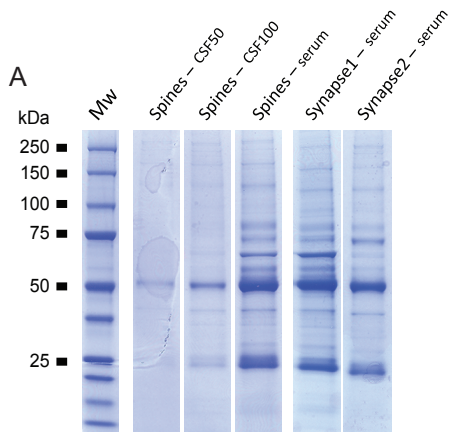

| accession | Unique peptides |                 |                |                  |                  |        | synonyms ncbi                                      | length      | Mascot score |                |                 |                |                  |
|-----------|-----------------|-----------------|----------------|------------------|------------------|--------|----------------------------------------------------|-------------|--------------|----------------|-----------------|----------------|------------------|
|           | Spines - CSF50  | Spines - CSF100 | Spines - serum | Synapse1 - serum | Synapse2 - serum | symbol |                                                    |             | description  | Spines - CSF50 | Spines - CSF100 | Spines - serum | Synapse1 - serum |
| G3V864    | 19              | 23              | 20             |                  |                  | Lppr4  | Lipid phosphate phosphatase-related protein type 4 | FRG1        | 766          | 1153           | 1419            | 1155           |                  |
| F1LZ36    |                 | 12              | 16             |                  |                  | Tenn4  | Protein Odz4                                       | ODZ4        | 2793         |                | 421             | 683            |                  |
| F1LPK4    |                 | 10              | 8              |                  | 2                | Gria2  | Glutamate receptor 2                               |             | 920          |                | 424             | 318            | 114              |
| F1LYN2    |                 | 4               | 7              |                  |                  | Tenn1  | Uncharacterized protein                            | ODZ1        | 2552         |                | 135             | 350            |                  |
| R46101    |                 | 9               | 5              |                  |                  | Dpp6   | Dipeptidyl aminopeptidase-like protein 6           | DFP6/DFPX   | 859          |                | 430             | 235            |                  |
| F1LNN7    | 4               | 8               | 4              |                  |                  | Ncan   | Neurocan core protein                              |             | 1258         | 119            | 337             | 148            |                  |
| B2RZ37    |                 |                 | 4              | 2                |                  | Reep5  | Receptor expression-enhancing protein 5            | Dp1         | 189          |                | 159             | 92             |                  |
| Q499T3    |                 | 3               | 4              |                  |                  | Sirpa  | Sirpa protein                                      |             | 513          |                | 99              | 134            |                  |
| Q62640    |                 |                 | 4              |                  |                  | Grid1  | Glutamate receptor delta-1 subunit                 |             | 1009         |                |                 | 139            |                  |
| P22963    | 5               | 9               | 3              |                  | 1                | Cntn2  | Contactin-2                                        | TAG1/TAX1   | 1040         | 185            | 460             | 170            | 55               |
| P35439    | 4               | 9               | 3              |                  | 2                | Grin1  | Glutamate (NMDA) receptor subunit zeta-1           | NMDAR1, NR1 | 938          | 164            | 336             | 116            | 90               |
| F1LR33    | 3               | 6               | 3              |                  |                  | Lppr2  | Lipid phosphate phosphatase-related protein type 2 | FRG4        | 452          | 188            | 285             | 209            |                  |
| Q7TMB0    | 2               | 9               | 2              |                  |                  | Lppr3  | Lipid phosphate phosphatase-related protein type 3 | FRG2        | 716          | 113            | 397             | 122            |                  |
| G3VQM3    | 2               | 2               |                |                  |                  | Lppr5  | Lipid phosphate phosphatase-related protein type 5 | FRG5        | 316          | 76             | 82              |                |                  |
| F1LR11    |                 | 2               |                |                  |                  | Lppr1  | Lipid phosphate phosphatase-related protein type 1 | FRG3        | 325          |                | 96              |                |                  |
